# Supplementary material
Source: PubMed Central journal article supplement (PMC9857796)
Supplement: jamasurg-e226826-s001.pdf [file jamasurg-e226826-s001.pdf]

## Supplementary Online Content

Heiden BT, Eaton DB Jr, Chang SH, et al. Association between surgical quality metric adherence and overall survival among US veterans with early-stage non–small cell lung cancer. *JAMA Surg*. Published online January 18, 2023. doi:10.1001/jamasurg.2022.6826

**eTable 1.** Multivariable Cox Proportional Hazards Model for Overall Survival

**eFigure 1.** VALCAN-O Score Distribution

**eTable 2.** Multivariable Competing Risk Model for Recurrence-Free Survival

**eFigure 2.** Relationship Between VALCAN-O and Overall Survival and Recurrence-free Survival in Subgroups Based on Pulmonary Function (A, B), Surgical Year (C, D), and Final Pathologic Stage (E, F)

**eTable 3.** Validation Cohort (NCDB)

This supplementary material has been provided by the authors to give readers additional information about their work.

**eTable 1.** Multivariable Cox Proportional Hazards Model for Overall Survival

| Variable                       | aHR, 95% CI         | P-Value |
|--------------------------------|---------------------|---------|
| Age                            | 1.022 (1.018-1.026) | <0.001  |
| Sex                            |                     |         |
| Male                           | [1 ref]             |         |
| Female                         | 0.681 (0.575-0.807) | <0.001  |
| Race                           |                     |         |
| White                          | [1 ref]             |         |
| Black                          | 0.836 (0.773-0.904) | <0.001  |
| Other                          | 0.971 (0.762-1.237) | 0.812   |
| Unknown                        | 0.961 (0.725-1.275) | 0.784   |
| Smoking status                 |                     |         |
| Current                        | [1 ref]             |         |
| Former                         | 0.886 (0.838-0.937) | <0.001  |
| Never                          | 0.575 (0.434-0.761) | <0.001  |
| BMI                            |                     |         |
| <18.5                          | 1.063 (0.965-1.170) | 0.2177  |
| 18.5-24.9                      | [1 ref]             |         |
| 25-29.9                        | 0.772 (0.724-0.824) | <0.001  |
| 30-34.9                        | 0.705 (0.650-0.763) | <0.001  |
| 35+                            | 0.775 (0.694-0.865) | <0.001  |
| Charlson Comorbidity Score     | 1.083 (1.068-1.099) | <0.001  |
| Number of unique prescriptions | 1.017 (1.013-1.021) | <0.001  |
| Hospital volume                | 1.000 (1.000-1.001) | 0.683   |
| Laterality                     |                     |         |
| Right                          | [1 ref]             |         |
| Left                           | 0.988 (0.937-1.043) | 0.668   |
| Tumor location                 |                     |         |
| Upper lobe                     | [1 ref]             |         |
| Middle or lower lobe           | 0.993 (0.937-1.052) | 0.803   |
| Tumor size (mm)                |                     |         |
| ≤10                            | [1 ref]             |         |
| 11-20                          | 1.002 (0.906-1.107) | 0.974   |
| 21-30                          | 1.097 (0.989-1.217) | 0.080   |
| 31-40                          | 1.349 (1.144-1.436) | <0.001  |
| >40                            | 1.349 (1.181-1.540) | <0.001  |
| Unknown                        | 0.568 (0.434-0.744) | <0.001  |
| Histology                      |                     |         |
| Adenocarcinoma                 | [1 ref]             |         |
| Squamous cell carcinoma        | 1.152 (1.087-1.222) | <0.001  |
| Other                          | 1.238 (1.142-1.341) | <0.001  |
| Pathological Upstage           |                     |         |
| No                             | [1 ref]             |         |
| Yes                            | 1.602 (1.482-1.731) | <0.001  |
| Delayed surgery                |                     |         |
| >12 weeks                      | [1 ref]             |         |
| ≤12 weeks                      | 0.890 (0.842-0.941) | <0.001  |

| <b>Variable</b>                | <b>aHR, 95% CI</b>  | <b>P-Value</b> |
|--------------------------------|---------------------|----------------|
| <b>Surgical approach</b>       |                     |                |
| Open                           | [1 ref]             |                |
| Minimally invasive             | 0.918 (0.867-0.971) | 0.003          |
| <b>Extent of resection</b>     |                     |                |
| Wedge                          | [1 ref]             |                |
| Lobectomy                      | 0.830 (0.771-0.894) | <0.001         |
| Segmentectomy                  | 0.825 (0.724-0.941) | 0.004          |
| Pneumonectomy                  | 1.080 (0.875-1.335) | 0.473          |
| <b>Nodal sampling adequacy</b> |                     |                |
| 0 LN                           | [1 ref]             |                |
| 1-4 LN                         | 0.876 (0.894-0.965) | 0.008          |
| 5-9 LN                         | 0.816 (0.737-0.903) | <0.001         |
| ≥10 LN                         | 0.777 (0.700-0.894) | <0.001         |
| <b>Surgical margin</b>         |                     |                |
| R1+                            | [1 ref]             |                |
| R0                             | 0.584 (0.511-0.667) | <0.001         |

**eFigure 1.** VALCAN-O Score Distribution

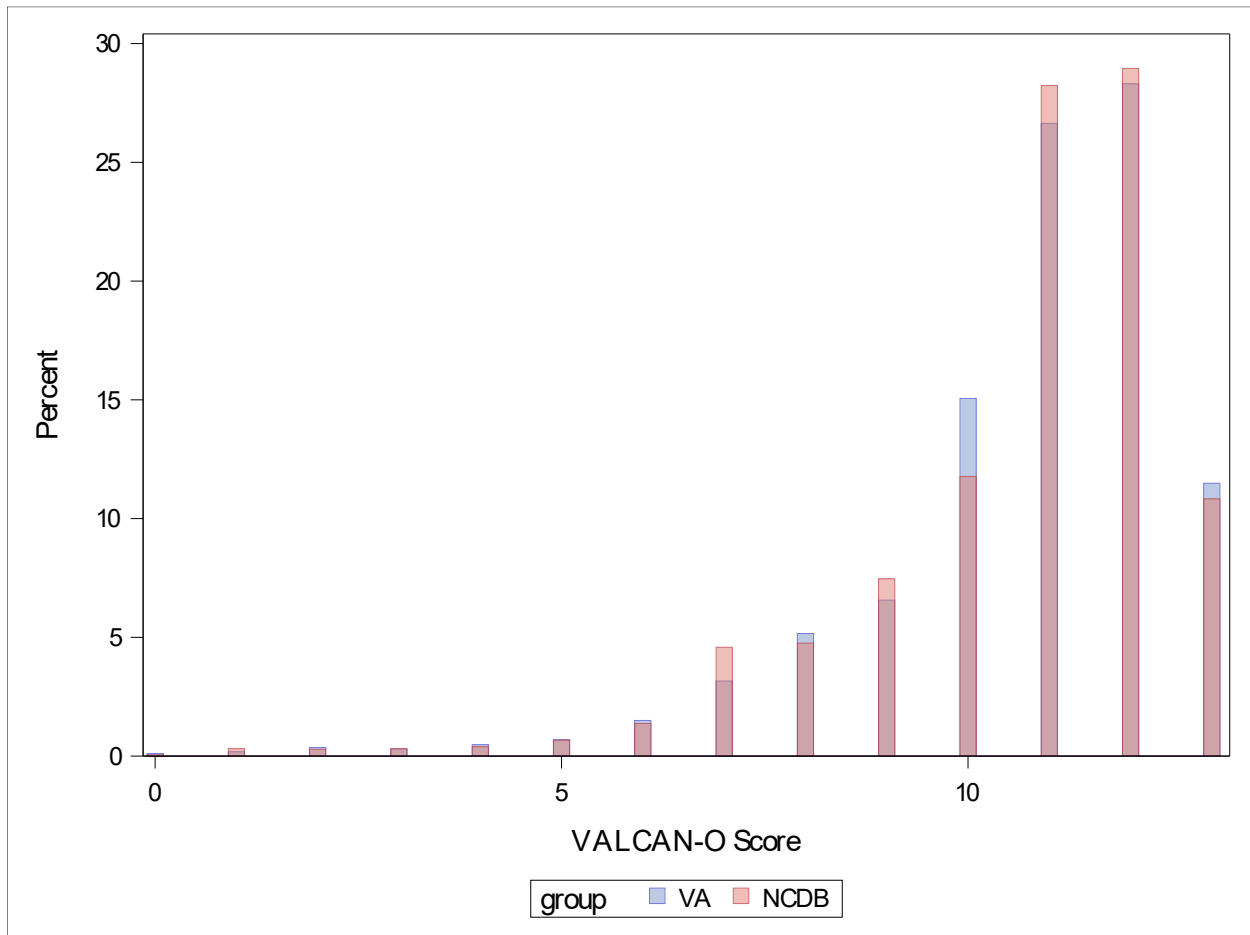

**eTable 2.** Multivariable Competing Risk Model for Recurrence-Free Survival

| Variable                       | aHR, 95% CI         | P-Value |
|--------------------------------|---------------------|---------|
| VALCAN-O score                 |                     |         |
| 0-5 points                     | [1 ref]             |         |
| 6-7 points                     | 0.630 (0.486-0.818) | <0.001  |
| 8-10 points                    | 0.505 (0.410-0.622) | <0.001  |
| 11-12 points                   | 0.403 (0.327-0.496) | <0.001  |
| Age                            | 0.994 (0.988-1.000) | 0.062   |
| Sex                            |                     |         |
| Male                           | [1 ref]             |         |
| Female                         | 0.825 (0.654-1.040) | 0.104   |
| Race                           |                     |         |
| White                          | [1 ref]             |         |
| Black                          | 0.946 (0.840-1.066) | 0.362   |
| Other                          | 0.896 (0.608-1.320) | 0.578   |
| Unknown                        | 0.706 (0.424-1.175) | 0.180   |
| Smoking status                 |                     |         |
| Current                        | [1 ref]             |         |
| Former                         | 0.969 (0.887-1.059) | 0.489   |
| Never                          | 1.103 (0.786-1.547) | 0.571   |
| BMI                            |                     |         |
| <18.5                          | 0.929 (0.787-1.097) | 0.386   |
| 18.5-24.9                      | [1 ref]             |         |
| 25-29.9                        | 0.926 (0.836-1.026) | 0.140   |
| 30-34.9                        | 0.897 (0.792-1.014) | 0.083   |
| ≥35.0                          | 0.911 (0.767-1.083) | 0.293   |
| Charlson Comorbidity Score     | 1.035 (1.011-1.059) | 0.004   |
| Number of unique prescriptions | 1.004 (0.998-1.010) | 0.167   |
| Area deprivation index         |                     |         |
| Q1 (least deprived)            | [1 ref]             |         |
| Q2                             | 1.043 (0.925-1.176) | 0.493   |
| Q3                             | 1.106 (0.982-1.246) | 0.097   |
| Q4 (most deprived)             | 1.068 (0.944-1.208) | 0.296   |
| Distance from hospital         |                     |         |
| <10                            | [1 ref]             |         |
| 10-50                          | 0.894 (0.803-0.996) | 0.042   |
| 50+                            | 0.733 (0.653-0.823) | <0.001  |
| Hospital volume                | 1.001 (1.000-1.002) | 0.063   |
| Laterality                     |                     |         |
| Right                          | [1 ref]             |         |
| Left                           | 0.991 (0.911-1.078) | 0.830   |
| Tumor location                 |                     |         |
| Upper lobe                     | [1 ref]             |         |
| Middle or lower lobe           | 1.025 (0.936-1.123) | 0.591   |

| <b>Variable</b>         | <b>aHR, 95% CI</b>  | <b>P-Value</b> |
|-------------------------|---------------------|----------------|
| Tumor size              |                     |                |
| ≤10                     | [1 ref]             |                |
| 11-20                   | 1.073 (0.911-1.264) | 0.400          |
| 21-30                   | 1.361 (1.151-1.609) | <0.001         |
| 31-40                   | 1.593 (1.329-1.909) | <0.001         |
| >40                     | 1.589 (1.287-1.963) | <0.001         |
| Unknown                 | 1.172 (0.850-1.615) | 0.333          |
| Histology               |                     |                |
| Adenocarcinoma          | [1 ref]             |                |
| Squamous cell carcinoma | 0.892 (0.811-0.980) | 0.018          |
| Other                   | 1.077 (0.949-1.222) | 0.251          |

**eFigure 2.** Relationship Between VALCAN-O and Overall Survival and Recurrence-free Survival in Subgroups Based on Pulmonary Function (A, B), Surgical Year (C, D), and Final Pathologic Stage (E, F)

(A)

**Overall Survival  
FEV1 ≥ 80%**

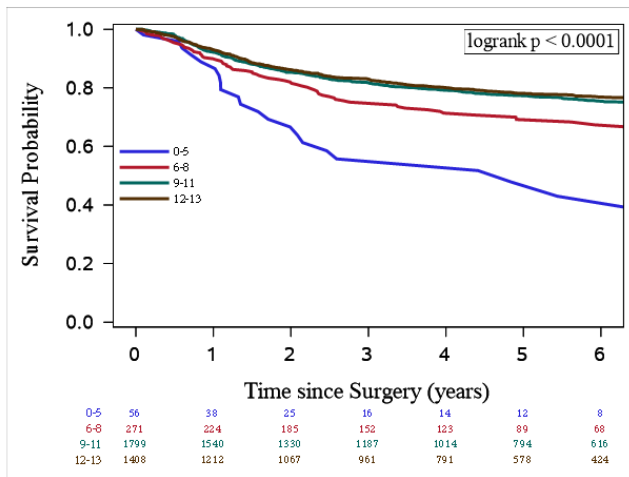

**FEV1 = 50-79%**

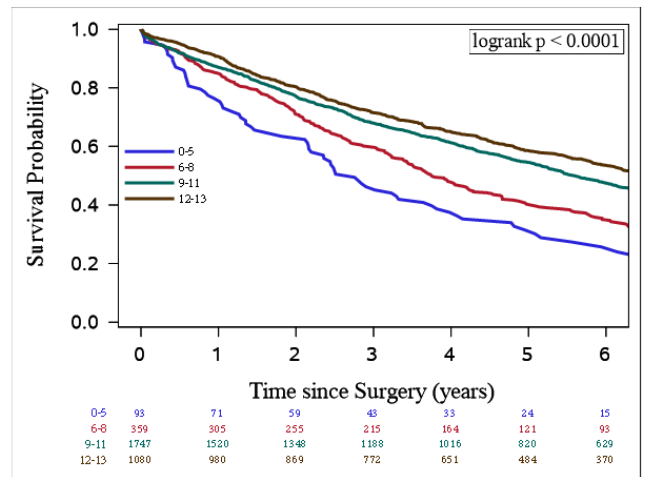

**FEV1 < 50%**

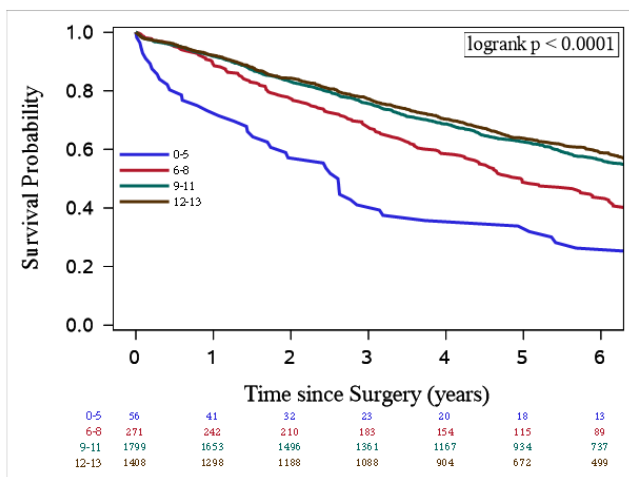

(B)

### Recurrence-free Survival

#### FEV1 ≥ 80%

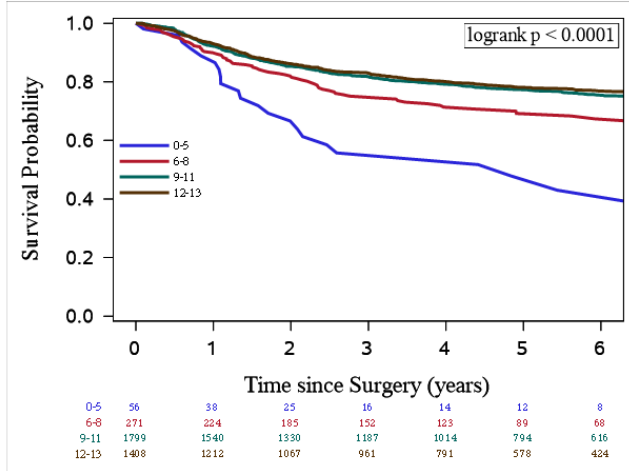

#### FEV1 = 50-79%

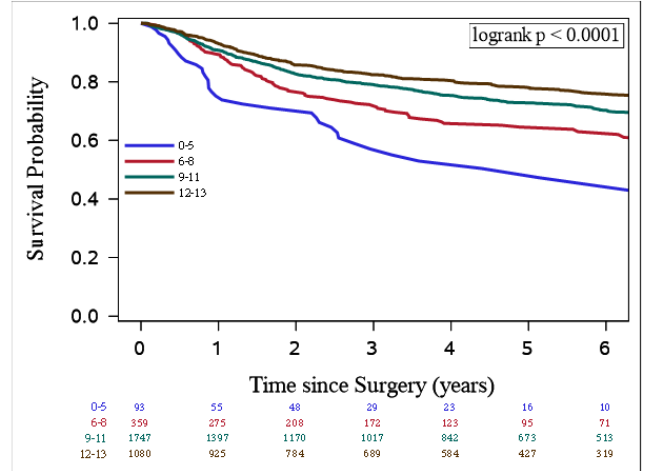

#### FEV1 < 50%

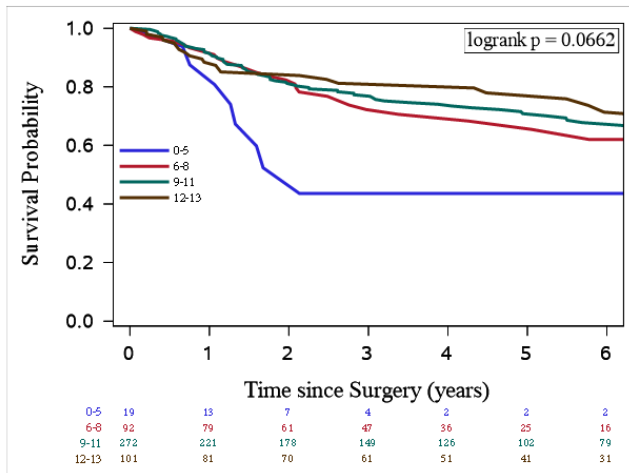



(C)

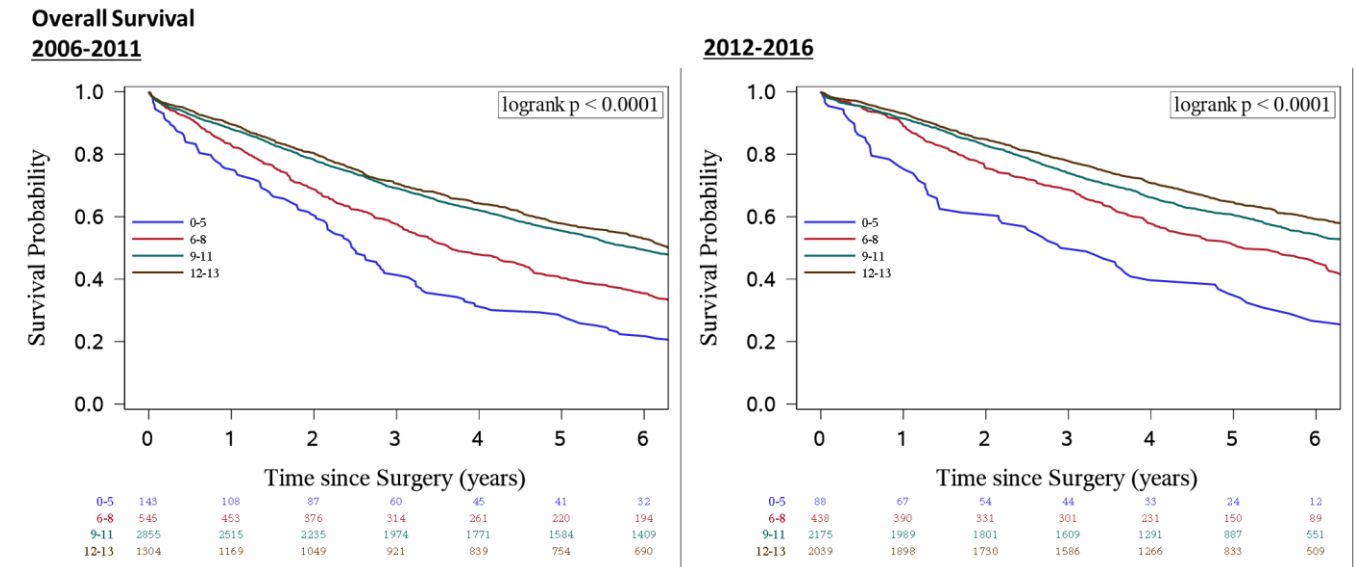

(D)

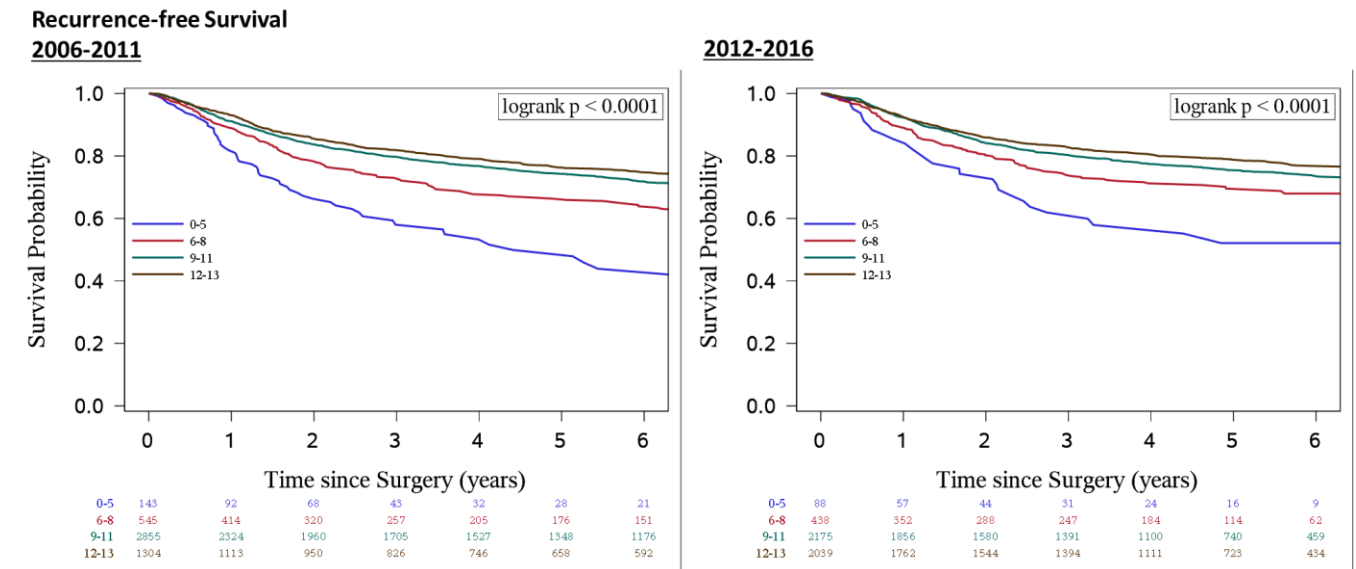

(E)

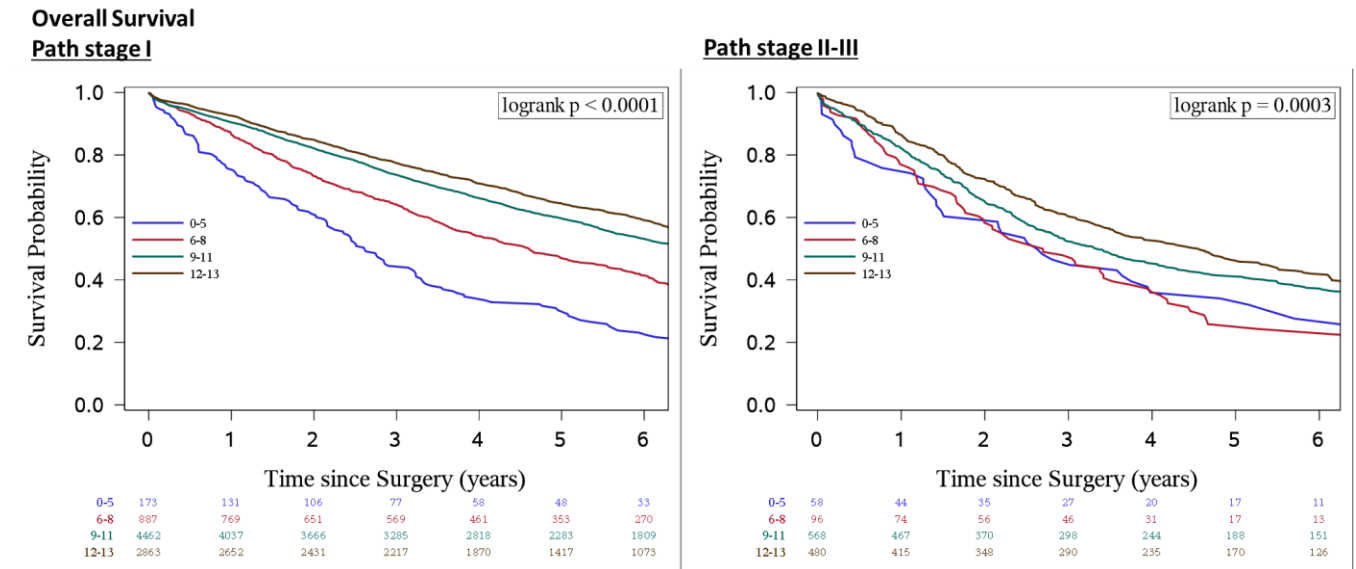

(F)

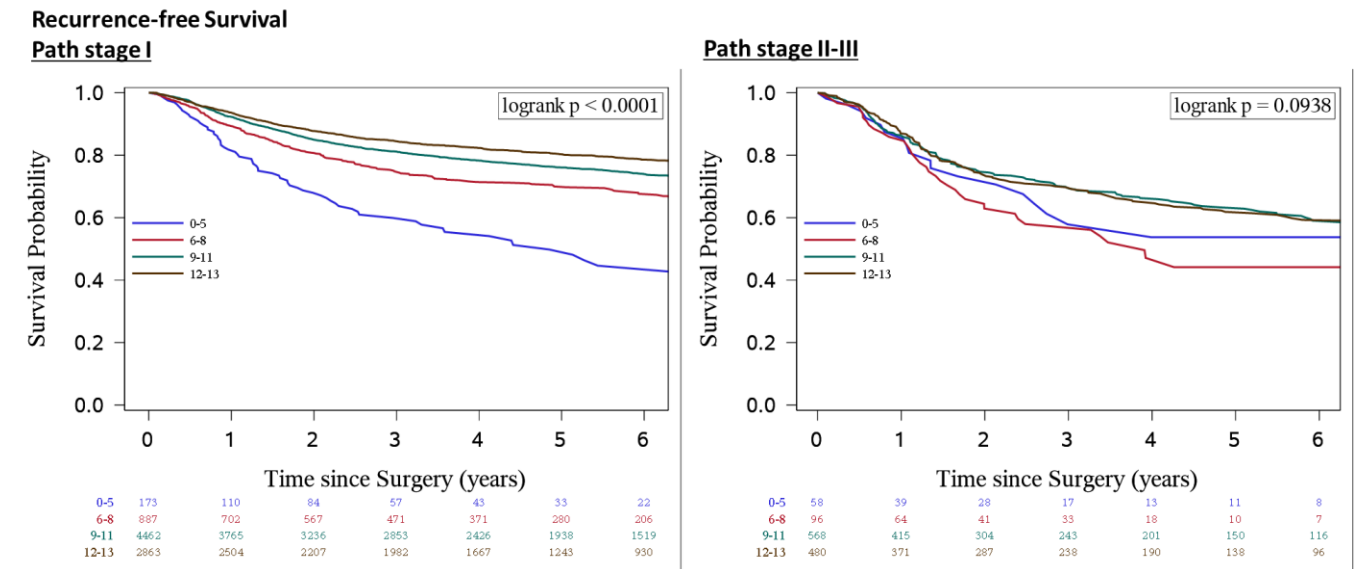

**eTable 3.** Validation Cohort (NCDB)

| <b>Variables</b>                  | <b>Validation cohort<br/>N=107,674</b> |
|-----------------------------------|----------------------------------------|
| Age (SD)                          | 67.80 (9.77)                           |
| Sex (%)                           |                                        |
| Male                              | 46,859 (43.52)                         |
| Female                            | 60,815 (56.48)                         |
| Race (%)                          |                                        |
| White                             | 94,899 (88.14)                         |
| Black                             | 8,841 (8.21)                           |
| Other                             | 3,305 (3.07)                           |
| Unknown                           | 629 (0.58)                             |
| Charlson comorbidity score (%)    |                                        |
| 0                                 | 53,439 (49.63)                         |
| 1                                 | 36,826 (34.20)                         |
| 2                                 | 12,769 (11.86)                         |
| 3+                                | 4,640 (4.31)                           |
| Distance from hospital (miles, %) |                                        |
| <10                               | 46,184 (42.89)                         |
| 10-50                             | 40,163 (37.30)                         |
| 50+                               | 11,471 (10.65)                         |
| Unknown                           | 9,856 (9.15)                           |
| Histology (%)                     |                                        |
| Adenocarcinoma                    | 68,396 (63.52)                         |
| Squamous cell carcinoma           | 25,284 (23.48)                         |
| Other                             | 13,994 (13.00)                         |
| Tumor Size (mm, %)                |                                        |
| ≤10                               | 10,710 (9.95)                          |
| 11-20                             | 44,601 (41.42)                         |
| 21-30                             | 30,732 (28.54)                         |
| 31-40                             | 14,979 (13.91)                         |
| >40                               | 6,652 (6.18)                           |
| <b>Surgical Quality Metrics</b>   |                                        |
| Timely surgery (%)                |                                        |
| ≤8 weeks                          | 85,142 (79.07)                         |
| >8 weeks                          | 22,532 (20.93)                         |
| Incision (%)                      |                                        |
| Thoracotomy                       | 65,475 (60.81)                         |
| Minimally invasive                | 42,199 (39.19)                         |
| Resection (%)                     |                                        |
| Lobectomy                         | 78,195 (72.62)                         |
| Wedge                             | 22,861 (21.33)                         |
| Segmentectomy                     | 5,225 (4.85)                           |
| Pneumonectomy                     | 1,393 (1.29)                           |

| <b>Variables</b>            | <b>Validation cohort<br/>N=107,674</b> |
|-----------------------------|----------------------------------------|
| Nodal sampling adequacy (%) |                                        |
| 0 LN                        | 12,416 (11.53)                         |
| 1-4 LN                      | 25,041 (23.26)                         |
| 5-9 LN                      | 32,332 (30.03)                         |
| ≥10 LN                      | 37,885 (35.18)                         |
| Margin (%)                  |                                        |
| R0                          | 104,778 (97.31)                        |
| R1+                         | 2,896 (2.69)                           |
